# Supplementary material for: Use High-Flow Nasal Cannula for Acute Respiratory Failure Patients in the Emergency Department: A Meta-Analysis Study
Source: Hindawi journal article supplement (doi:10.1155/2019/2130935), 2019-10-13

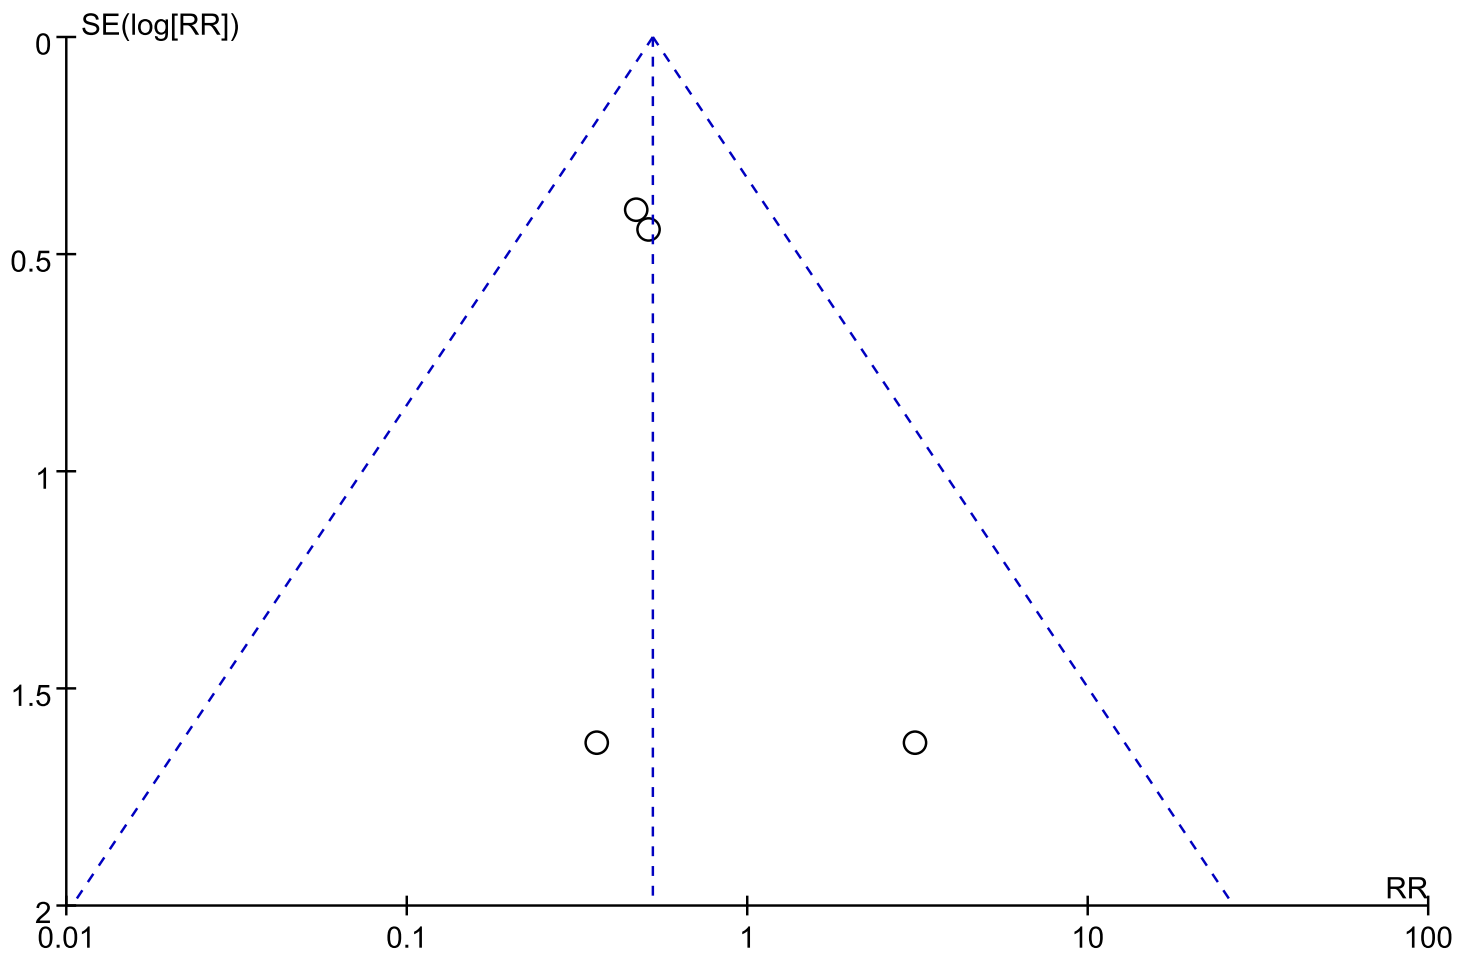

Supplement: f1 [file 2130935.f1.pdf]
